# Supplementary material for: Requirements for inventory models of radioactive waste
Source: Copernicus journal article supplement (doi:10.5194/sand-2-99-2023), 2023-09-06
Supplement: Supplementary file 1 [file sand-2-99-2023-supplement.pdf]

Supplement of Saf. Nucl. Waste Disposal, 2, 99–99, 2023  
<https://doi.org/10.5194/sand-2-99-2023-supplement>  
© Author(s) 2023. CC BY 4.0 License.

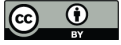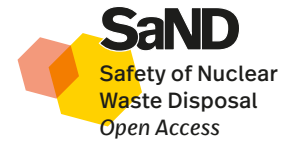

*Supplement of*

## **Requirements for inventory models of radioactive waste**

**Berit Rauscher et al.**

*Correspondence to:* Marika Vespa (m.vespa@brenk.com)

The copyright of individual parts of the supplement might differ from the article licence.

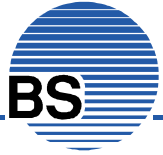

---

# Requirements for inventory models of radioactive waste

Berit Rauscher, Marika Vespa,  
Kirsten Haneke

Brenk Systemplanung GmbH

SafeND

Berlin 12-15.09.2023

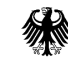

Bundesamt  
für die Sicherheit  
der nuklearen Entsorgung

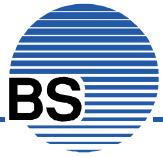

# Agenda

---

- Company profile
- Project aim
- Approach & results
  - Type of waste
  - Regulatory framework
  - Requirements of inventory systems
  - Uncertainties & sensitivity
- Summary
- Conclusion

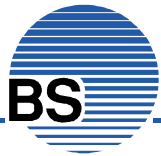

# Company profile

Radiation Protection  
Nuclear Engineering  
Decommissioning

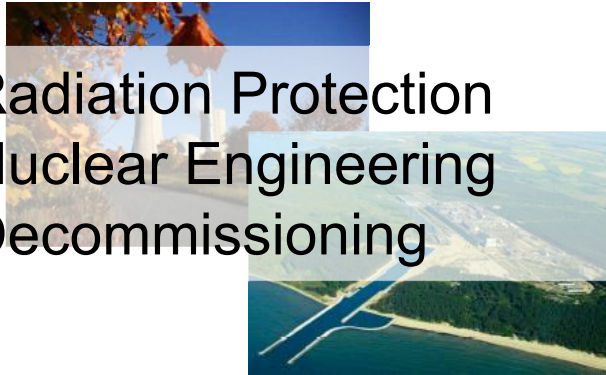

Dismantling  
Radiation Measurements  
Radiation Protection Officers

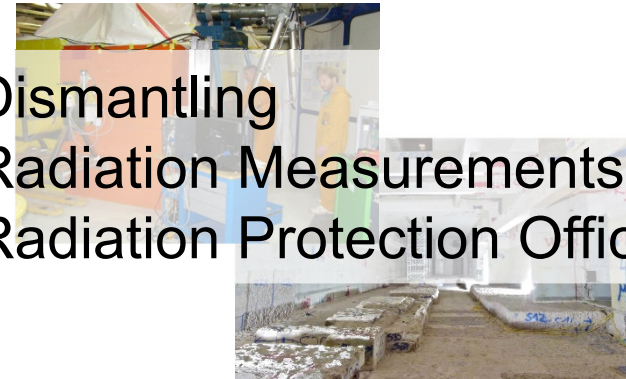

Radwaste Disposal  
Mining  
Environmental Management

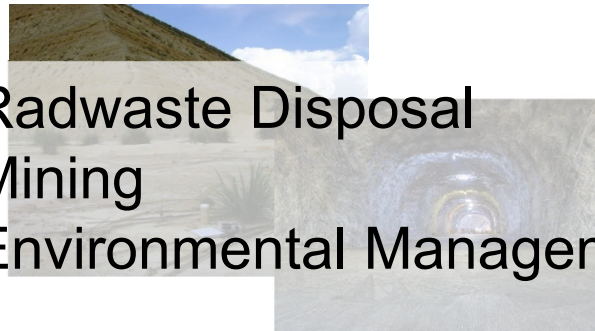

Digitisation  
Applied Radiation Protection  
NORM

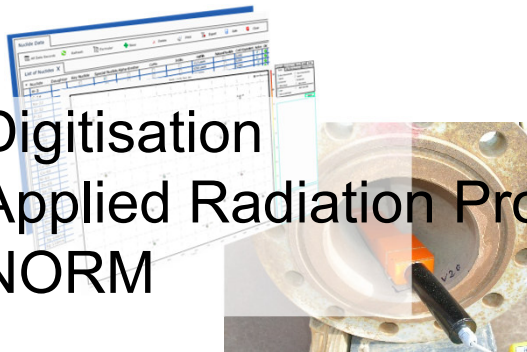

Plants  
Processes  
Energy

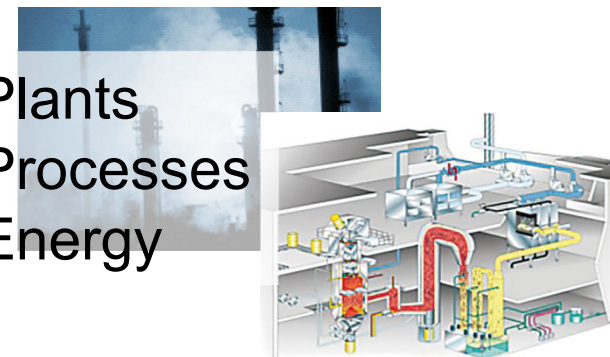



# Project aim

---

## Background:

**Federal Office for the Safety of Nuclear Waste Management (BASE)** reviews the **preliminary safety investigations** within the German **site selection** procedure governed by the German Site Selection Act

## Tasks:

Development of a **compilation (phase & host rock related) & scientific justification** of the requirements for compiling an inventory model for high-level radioactive waste:

- Mandatory parameters within the inventory model
- General assessments of the existing uncertainties of the inventory data and their potential impact on repository-relevant aspects (sensitivity)

## ➤ Heat generating waste

**B**

- Irradiated fuel assemblies
- Irradiated fuel cans

**V**

- Vitrified reprocessing waste

**S**

- Other reprocessing waste, e.g. compacted waste

**A**

- General waste (unless restricted to a specific waste stream)

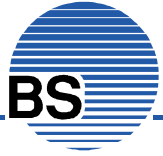

# REGULATORY FRAMEWORK



# Regulatory Framework

Description of the regulatory framework for the inventory

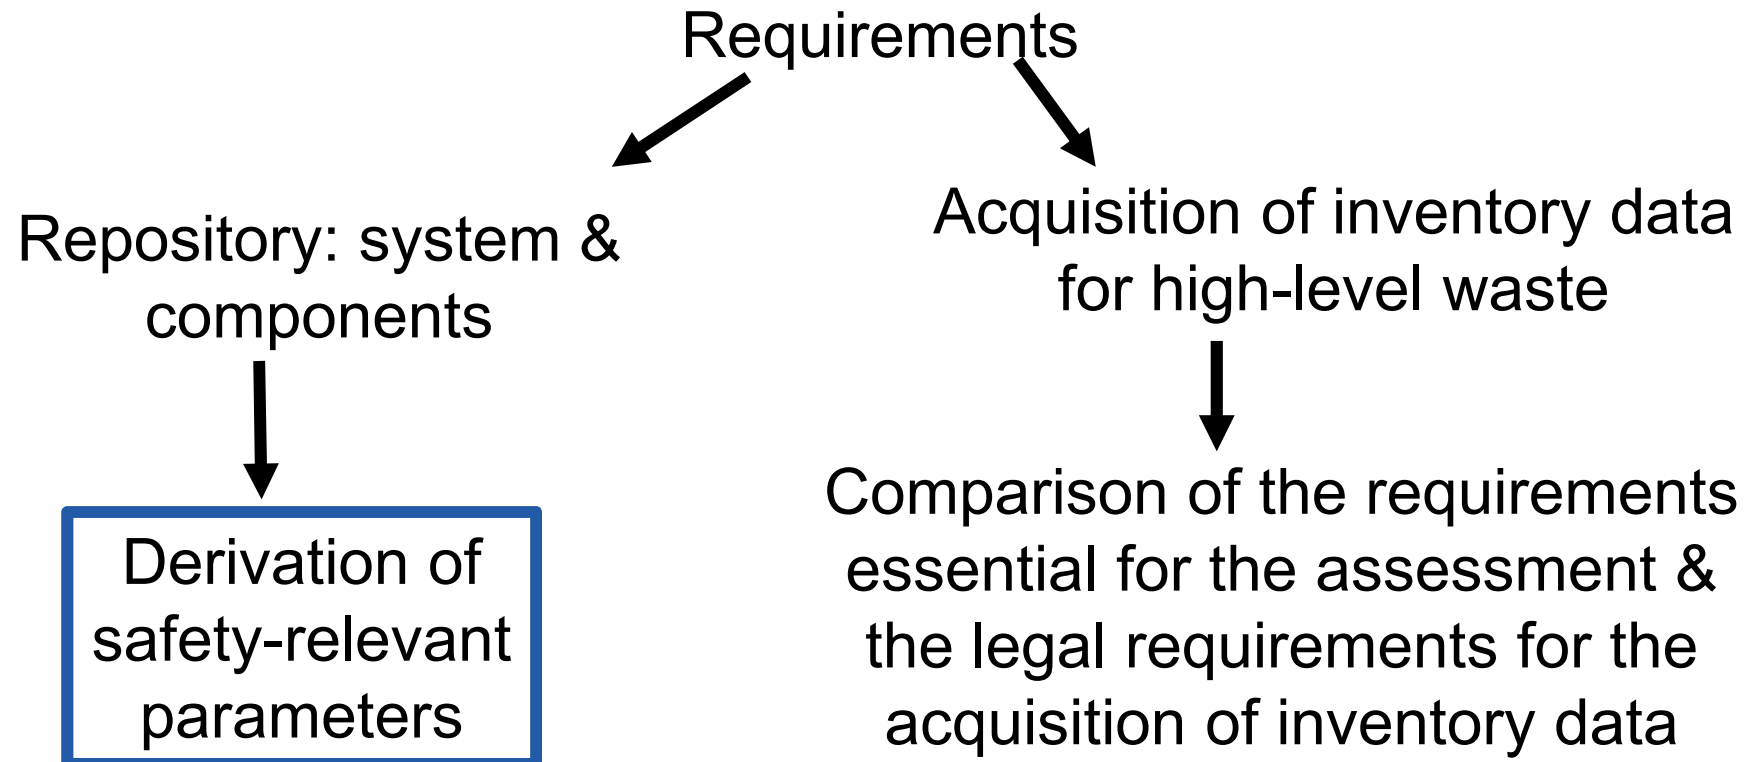

German laws (e. g. StandAG), sub-statutory regulations (e. g. EndlSiAnfV, AtEV), best-practice docs (ESK, public reports), int. Guidelines (e.g IAEA,NEA)





# Safety-relevant parameters

- Effective multiplication factor  $\times ?$
- Radionuclide discharge (mass & quantity) from the area of the essential barriers 
- Additional annual effective dose for individuals 
- Body dose  
- Temperature at the container surface 
- Temperatur, pH-value & pressure in the storage area 
- Thickness of the container coating or of the final storage container 

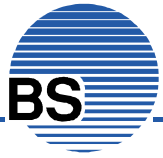

# REQUIREMENTS FOR INVENTORY SYSTEMS

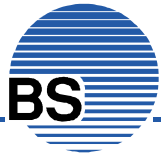

# Requirements for inventory systems

Development of req. for inventory models corresponding to the state-of-the-art in science & technology (S&T)

*National specifications*

- FEP-catalogue evaluation
- Impact of extended interim storage

Gorleben preliminary safety analysis (rock salt), ANSICHT (clay rock), CHRISTA (crystalline rock)

*Requirements (#58) for inventory models*

*International requirements*

Review on international S&T

Transfer to the German programme

Reports from France, Switzerland, Finland, Sweden, Canada

Transfer of the identified international req. (#279) to the German programme

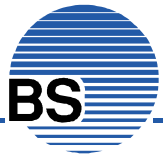

# Requirements for inventory systems: International

## Analysis of the international state-of-the-art in S&T (1):

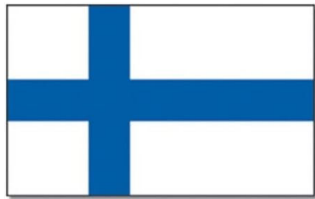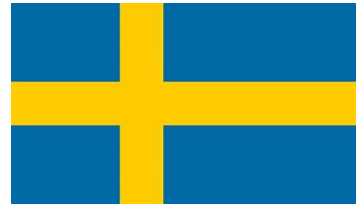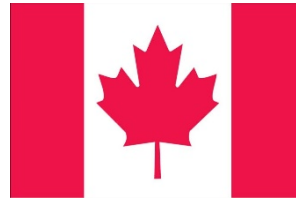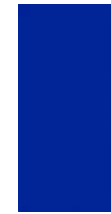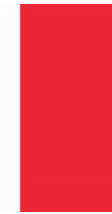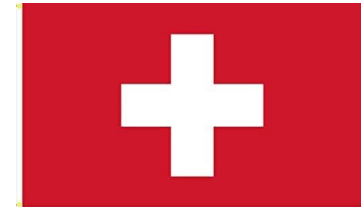

➤ **Long-term safety** requirements (which)

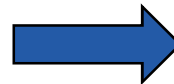

Compliance with safety-relevant parameters

- Radiological (e.g. annual dose)
- non-radiological (e.g. hazard quotient)

➤ Derivation of the requirements for inventory models from **the repository concept & the waste data** (how)

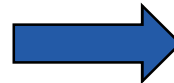

All input parameters of model calculations performed within the framework of the safety analysis



# Requirements for inventory systems: International

## Analysis of the international state-of-the-art in S&T (1):

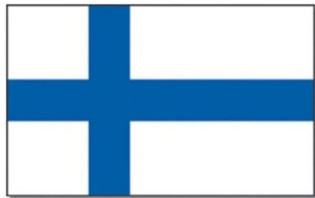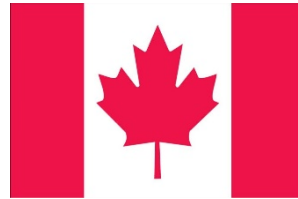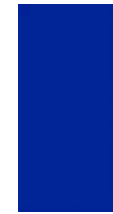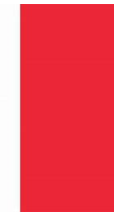

➤ Requirements on the **quality & scope** of the inventory data (what)

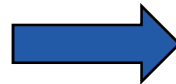

Knowledge dossiers: Compilation of qualified information on all safety-relevant waste properties

- based on the best available experimental knowledge & expert judgment
- verification according to an accepted QA standard

➤ **Implementation** of the requirements in the programme (how)

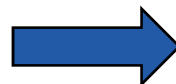

Inventory data refer to reference waste or reference containers



# Requirements for inventory systems

## Requirements for waste-specific inventory data:

| Group        | Example                                                            | # of identified requirements |   |   |
|--------------|--------------------------------------------------------------------|------------------------------|---|---|
|              |                                                                    | B                            | V | S |
| General      | <i>waste type, number of fuel rods</i>                             | 5                            | 1 | 1 |
| Geometrical  | <i>volume, length</i>                                              | 15                           | 3 | 3 |
| Physical     | <i>mass, density</i>                                               | 2                            | 2 | 2 |
| Material     | <i>(component-specific) composition</i>                            | 6                            | 3 | 4 |
| Chemical     | <i>(component-specific) chemical composition</i>                   | 1                            | 1 | 1 |
| Radiological | <i>(component-specific) radionuclide inventory, total activity</i> | 6                            | 4 | 4 |
| Thermal      | <i>decay power</i>                                                 | 1                            | 1 | 1 |

B – fuel assembly    V – vitrified reprocessing waste    S – other reprocessing waste



# Requirements for inventory systems

## Further requirements for inventory systems:

| Requirements                                          | Group                                                 | Example                                            |
|-------------------------------------------------------|-------------------------------------------------------|----------------------------------------------------|
| Reference waste                                       | chemical, geometrical, physical, thermal              | <i>fission gas release</i>                         |
| Repository containers & their components              | geometrical, physical, material, thermal              | <i>metal surface size</i>                          |
| Final storage package                                 | general, geometrical, material, radiological, thermal | <i>void volume, moisture</i>                       |
| Requirements depending on the geochemical environment | chemical                                              | <i>release-specific, e.g. metal corrosion rate</i> |
|                                                       | chemical                                              | <i>transport-specific, e.g. colloid formation</i>  |



# UNCERTAINTIES & SENSITIVITY





# Uncertainties & Sensitivity

Assessments of the existing

**Uncertainties:** inventory data

**Sensitivity:** potential impact of uncertainties on repository-relevant aspects

Semi-quantitative estimation

Evaluation of the sensitivity

- waste-specific inventory **data uncertainties**
- **bandwidths** (conceptual inaccuracies) of the waste-specific inventory data

- **safety-relevant parameters** with regard to the waste-specific inventory data
- repository design, operation and post-closure phase (**factors**) with regard to the waste-specific inventory data

FEP-catalogue, international state-of-the-art S&T, scientific literature

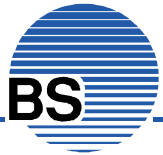

# Uncertainties & Sensitivity

## Approach for determining the uncertainties:

1. Development of correlations between the inventory data
  - most important **influencing** and **influenced** variables
2. Semi-quantitative (minor, medium, large) estimation of data uncertainties based on
  - determination method of the respective parameter
  - requirements for the determination method
  - existing information on uncertainties (literature)
3. Semi-quantitative (minor, medium, large) estimation of the bandwidth
  - data availability for the respective parameter

| Inventory data              | Data uncertainty | Bandwidth |
|-----------------------------|------------------|-----------|
| Burn-up of the nuclear fuel | minor            | large     |



# Uncertainties & Sensitivity

## Approach for determining the sensitivity:

1. Identification of
  - safety-relevant parameters with regard to the waste-specific inventory data  
→ 7 identified safety-relevant parameters
  - repository design, operation and post-closure phase factors with regard to the waste-specific inventory data  
→ 3 identified factors
2. Evaluation of correlations between waste-specific inventory data and safety-relevant target variables or factors (incl. justification)
  - Correlation given? Correlation significant?

| Inventory data              | Safety-relevant parameters |   |   |   |   |   |   | Factors |   |   |
|-----------------------------|----------------------------|---|---|---|---|---|---|---------|---|---|
|                             | 1                          | 2 | 3 | 4 | 5 | 6 | 7 | 1       | 2 | 3 |
| Burn-up of the nuclear fuel | Y                          | N | Y | Y | Y | Y | Y | Y       | Y | Y |

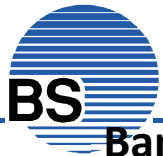

# Summary: Classification of inventory data into prioritisation groups

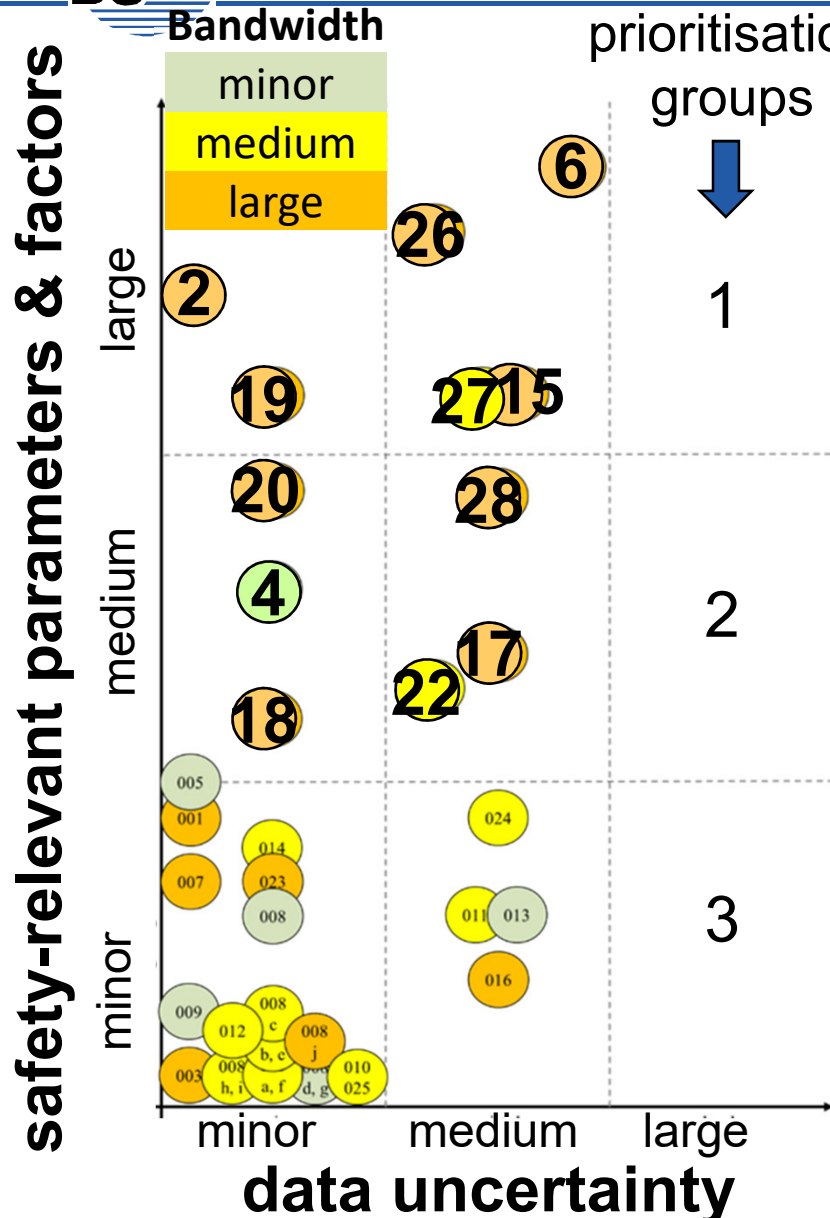

## Prioritisation group 1

- 6 (component-specific) chemical comp.
- 26 fissile materials & their isotopic comp.
- 2 date of removal from the reactor core (discharge)
- 19 burn-up of the nuclear fuel
- 27 mass of heavy metal
- 15 (component-specific) Rn-inventory

## Prioritisation group 2

- 28 decay power
- 20 radiation dose rate
- 4 classification of spent fuel assembly
- 17 gaseous (and volatile) radionuclides
- 22 metals
- 18 (initial) enrichment level



# Conclusion

---

## Key data identification of high-level radioactive waste inventories

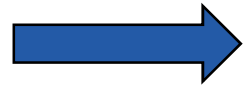

### Safety Assessments

- Site selection earlier stages, e.g. planning
- Repository operational stage
- Repository Closure
- Repository Post-closure & long term

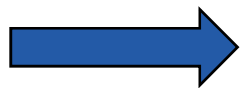

### Open questions

- Research needed
  - Instant Release Fraction (IRF)
  - Repository containers
- Determination of uncertainties should not be underestimated



# Acknowledgement

---

This research has been supported by

- Federal Office for the Safety of Nuclear Waste Management (BASE Bundesamt für Sicherheit der Nuklear Entsorgung, grant no. Z6 – BASE62214/4721E03230)

Report will be available online:

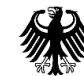

Bundesamt  
für die Sicherheit  
der nuklearen Entsorgung

[BASE - Abgeschlossene Forschungsprojekte \(bund.de\)](https://www.bund.de)



**THANK YOU FOR YOUR  
ATTENTION!**

Dr. Marika Vespa  
[m.vespa@brenk.com](mailto:m.vespa@brenk.com)
